# Supplementary material for: Undercarboxylated osteocalcin inhibits the early differentiation of osteoclast mediated by Gprc6a
Source: PeerJ journal article supplement (doi:10.7717/peerj.10898), 2021-03-02
Supplement: rawdata.zip [file rawdata.zip]

## Sheet: Sheet1
	24h						48h						72h
0	0.5413	0.5693	0.4453	0.5083	0.5373	0.5253	0.8658	1.0368	1.2108	1.1708	1.2238	1.2168	1.5035	1.6135	2.1475	1.8345	1.9395	1.5605
1	0.2913	0.3293	0.2863	0.2573	0.2923	0.2893	0.5858	0.6438	0.5098	0.5358	0.6118	0.5358	1.1375	1.3725	1.8755	1.5695	1.7845	1.2405
10	0.2233	0.2553	0.2233	0.2413	0.2773	0.2733	0.5888	0.5848	0.5358	0.5908	0.4918	0.4908	1.2225	1.6665	1.6405	1.4155	1.3835	1.0325
100	0.2623	0.2933	0.3243	0.2683	0.3073	0.2533	0.5178	0.5978	0.5738	0.4878	0.6178	0.5118	1.0995	1.2295	1.4795	1.3005	1.2355	0.9935
1000	0.2903	0.2963	0.3113	0.3023	0.2973	0.2493	0.4688	0.5078	0.5068	0.4568	0.4928	0.4598	1.0755	1.1245	1.3925	0.8555	1.1735	0.8205
	24h	48h	72h
0	0.521133	1.1208	1.7665	0.0422394	0.143182	0.25089
1	0.290967	0.570467	1.49667	0.0229318	0.051779	0.297223
10	0.248967	0.547133	1.3935	0.0237122	0.0478024	0.243181
100	0.2848	0.551133	1.223	0.0279625	0.0525459	0.167284
1000	0.291133	0.482133	1.07367	0.0216649	0.023235	0.212555
	0	1	10	100	1000
24h	0.521133	0.290967	0.248967	0.2848	0.291133
48h	1.1208	0.570467	0.547133	0.551133	0.482133
72h	1.7665	1.49667	1.3935	1.223	1.07367
	0.0422394	0.0229318	0.0237122	0.0279625	0.0216649
	0.143182	0.051779	0.0478024	0.0525459	0.023235
	0.25089	0.297223	0.243181	0.167284	0.212555
